# Supplementary material
Source: publisher site journal article supplement (https://www.spandidos-publications.com/5798/downloadSupplementary)
Supplement: Supplementary file 1 [file downloadSupplementary]

## Sheet: Sheet1
Supplementary Table SIV Clinical characters of LUAD patients selected
Accession	gender	Age(Y)	stage	OS(months)	vital	Delect(1=dead that observed by LUAD)
GSM1012830	Male	55.3863	IIIB	11.1781	D	1
GSM1012831	Male	81.3726	IIB	9.36986	D	1
GSM1012832	Male	63.6411	IB	34.1918	D	1
GSM1012833	Female	60.1973	IB	33.6329	D	1
GSM1012835	Male	67.389	IIIB	107.211	D	1
GSM1012838	Male	78.2192	IB	88.3726	D	1
GSM1012844	Female	56.074	IIIA	33.5342	D	1
GSM1012845	Female	69.611	IIIA	14.8274	D	1
GSM1012848	Male	70.6384	IA	27.8466	D	1
GSM1012851	Male	72.7562	IIIA	22.3233	D	1
GSM1012855	Female	73.2795	IIIA	34.2575	D	1
GSM1012856	Male	64.5589	IIB	38.7288	D	1
GSM1012858	Female	59.6767	IB	14.0712	D	1
GSM1012860	Male	67.5534	IIIA	3.58356	D	1
GSM1012861	Male	72.3726	IB	21.6986	D	1
GSM1012864	Male	83.1616	IB	31.726	D	1
GSM1012865	Male	75.6959	IIIA	50.4	D	1
GSM1012878	Female	72.0493	IIB	11.6712	D	1
GSM1012879	Male	49.9781	IB	61.9397	D	1
GSM1012890	Female	48.2685	IIIA	24.3945	D	1
GSM1012891	Female	68.3781	IIIB	34.8822	D	1
GSM1012899	Male	59.474	IIB	25.9068	D	1
GSM1012900	Female	60.9781	IIA	40.6027	D	1
GSM1012903	Female	60.3918	IB	60.8219	D	1
GSM1012906	Female	50.937	IB	73.5781	D	1
GSM1012909	Female	61.0247	IA	55.4959	D	1
GSM1012910	Male	62.4849	IIA	28.0767	D	1
GSM1012923	Female	64.8658	IB	51.6822	D	1
GSM1012924	Female	49.7863	IIIA	48	D	1
GSM1012928	Female	76.8137	IB	26.3014	D	1
GSM1012931	Male	62.9233	IIIB	30.9699	D	1
GSM1012940	Male	47.4521	IIB	15.6493	D	1
GSM1012941	Male	30.4137	IV	9.63288	D	1
GSM1012944	Female	54.9753	IB	66.6082	D	1
GSM1012954	Female	41.0219	IIIA	39.0575	D	1
GSM1012956	Female	59.5425	IIIA	4.27397	D	1
GSM1012959	Female	64.4767	IIIA	34.1589	D	1
GSM1012967	Female	81.2603	IB	35.1781	D	1
GSM1012976	Male	57.4493	IIB	49.3808	D	1
GSM1012981	Male	65.2575	IIB	29.1945	D	1
GSM1012989	Female	53.1507	IIIA	44.5151	D	1
GSM1012990	Male	44.1616	IB	39.8466	D	1
GSM1012992	Male	78.2658	IIIA	22.3562	D	1
GSM1012994	Male	79.7753	IB	7.82466	D	1
GSM1012996	Male	78.3205	IIIA	14.4658	D	1
GSM1012999	Male	71.0795	IIIB	33.9288	D	1
GSM1013005	Male	60.7753	IIB	12.4274	D	1
GSM1013006	Male	75.8959	IA	14.926	D	1
GSM1013014	Male	81.2575	IV	4.99726	D	1
GSM1013015	Female	50.1041	IIIB	9.30411	D	1
GSM1013025	Male	74.9863	IIIB	33.6	D	1
GSM1013032	Male	51.3671	IIIB	5.06301	D	1
GSM1013036	Female	59.2137	IB	27.8137	D	1
GSM1013052	Male	80.0521	IIIB	17.9507	D	1
GSM1013058	Female	64.3945	IA	22.2904	D	1
GSM1013060	Male	63.7589	IV	18.7068	D	1
GSM1013065	Male	81.863	IIIB	14.4658	D	1
GSM1013083	Female	57.2466	IIIB	8.71233	D	1
GSM1013091	Male	73.3123	IA	10.0274	D	1
GSM1013096	Male	66.9479	IB	17.2603	D	1
GSM1013098	Female	62.3233	IIIA	6.80548	D	1
GSM1032881	Male	63.8	IB	33.6	D	1
GSM1032882	Female	60.4	IB	33.6	D	1
GSM1032884	Male	67.6	IIIB	106.8	D	1
GSM1032887	Male	78.4	IB	88.8	D	1
GSM1032893	Female	69.8	IIIA	14.4	D	1
GSM1032895	Male	70.8	IA	27.6	D	1
GSM1032901	Female	73.5	IIIA	34.8	D	1
GSM1032902	Male	64.7	IIB	38.4	D	1
GSM1032903	Female	59.8	IB	14.4	D	1
GSM1032905	Male	72.6	IB	21.6	D	1
GSM1032906	Male	83.4	IB	31.2	D	1
GSM1032907	Male	75.9	IIIA	50.4	D	1
GSM1032919	Female	72.2	IIB	12	D	1
GSM1032920	Male	50.1	IB	62.4	D	1
GSM1032932	Female	61.1	IIA	40.8	D	1
GSM1032935	Female	60.6	IB	61.2	D	1
GSM1032938	Female	51.1	IB	73.2	D	1
GSM1032939	Female	61.2	IA	55.2	D	1
GSM1032940	Male	62.7	IIA	27.6	D	1
GSM1032948	Female	65	IB	51.6	D	1
GSM1032951	Female	77	IB	26.4	D	1
GSM1032961	Male	47.6	IIB	15.6	D	1
GSM1032981	Female	81.5	IB	34.8	D	1
GSM1032988	Male	57.6	IIB	49.2	D	1
GSM1032993	Male	65.4	IIB	28.8	D	1
GSM1032999	Male	44.3	IB	39.6	D	1
GSM1033001	Male	78.5	IIIA	22.8	D	1
GSM1033003	Male	80	IB	8.4	D	1
GSM1033006	Male	71.3	IIIB	33.6	D	1
GSM1033010	Male	60.9	IIB	12	D	1
GSM1033011	Male	76.1	IA	14.4	D	1
GSM1033019	Male	81.5	IV	4.8	D	1
GSM1033031	Female	59.4	IB	27.6	D	1
GSM1033040	Male	80.3	IIIB	18	D	1
GSM1033044	Female	64.6	IA	22.8	D	1
GSM1033049	Male	82.1	IIIB	14.4	D	1
